# Supplementary material for: Chiral twisting in a bacterial cytoskeletal polymer affects filament size and orientation
Source: PubMed Central journal article supplement (PMC7075873; doi:10.1038/s41467-020-14752-9), 2020-03-16
Supplement: 41467_2020_14752_MOESM1_ESM.pdf [file 41467_2020_14752_MOESM1_ESM.pdf]

1

2

3

# Supplementary Information

4

**Chiral twisting in a bacterial cytoskeletal polymer affects filament size and**

5

**orientation**

6

7

**Shi *et al.***

8

9 **Supplemental Tables**

10 **Supplementary Table 1: List of MD simulation systems from this study.**

| <b>Name</b>         | <b>Structure source</b>        | <b>Ligand</b>                                    | <b>Atoms (x1000)</b> | <b>Time (ns)</b> | <b>Replicates</b> |
|---------------------|--------------------------------|--------------------------------------------------|----------------------|------------------|-------------------|
| 1x1 ATP             | PDB: 4CZF                      | ATP and Mg <sup>2+</sup>                         | 95                   | 80               | 2                 |
| 1x1 ADP             | PDB: 4CZF                      | ADP and Mg <sup>2+</sup>                         | 95                   | 80               | 2                 |
| 1x1 ATP<br>A22      | PDB: 4CZF                      | ATP, A22, and Mg <sup>2+</sup>                   | 95                   | 70               | 1                 |
| 1x1 ATP<br>steered  | PDB: 4CZF                      | ATP and Mg <sup>2+</sup>                         | 95                   | 70               | 2                 |
| 1x1 ATP<br>(TmMreB) | PDB: 1JCG                      | ATP and Mg <sup>2+</sup>                         | 95                   | 80               | 2                 |
| 2x1 ATP             | PDB: 4CZF                      | 2xATP and 2xMg <sup>2+</sup>                     | 130                  | 120              | 2                 |
| 2x1 ADP             | PDB: 4CZF                      | 2xADP and 2xMg <sup>2+</sup>                     | 130                  | 120              | 2                 |
| 4x2 ATP             | PDB: 4CZF                      | 8xATP and 8xMg <sup>2+</sup>                     | 356                  | 500              | 2                 |
| 4x2 ADP             | PDB: 4CZF                      | 8xADP and 8xMg <sup>2+</sup>                     | 356                  | 500              | 2                 |
| 8x2 ATP             | PDB: 4CZF                      | 16xATP and 16xMg <sup>2+</sup>                   | 689                  | 57               | 1                 |
| 4x2 ATP<br>(EcMreB) | PDB: 4CZF<br>homology<br>model | 8xATP and 8xMg <sup>2+</sup>                     | 356                  | 100              | 2                 |
| 4x2 ATP<br>membrane | PDB: 4CZF                      | 8xATP and 8xMg <sup>2+</sup> ,<br>membrane patch | 434                  | 120              | 2                 |

|                               |                                  |                                                  |     |     |   |
|-------------------------------|----------------------------------|--------------------------------------------------|-----|-----|---|
| 4x2 ADP<br>membrane           | PDB: 4CZF                        | 8xADP and 8xMg <sup>2+</sup> ,<br>membrane patch | 434 | 120 | 2 |
| 2x1 ATP<br>membrane           | PDB: 4CZF                        | 2xATP and 2xMg <sup>2+</sup> ,<br>membrane patch | 202 | 80  | 1 |
| 2x1 ADP<br>membrane           | PDB: 4CZF                        | 2xADP and 2xMg <sup>2+</sup> ,<br>membrane patch | 202 | 80  | 1 |
| 4x1 ATP<br>membrane           | PDB: 4CZF                        | 4xATP and 4xMg <sup>2+</sup> ,<br>membrane patch | 437 | 80  | 2 |
| 4x2 ATP<br>(E275D)            | PDB: 4CZF<br>(E275D<br>mutation) | 8xATP and 8xMg <sup>2+</sup>                     | 356 | 120 | 2 |
| 4x2 ATP<br>(I138V)            | PDB: 4CZF<br>(I138V<br>mutation) | 8xATP and 8xMg <sup>2+</sup>                     | 356 | 120 | 2 |
| 4x2 ATP<br>(R121C)            | PDB: 4CZF<br>(R121C<br>mutation) | 8xATP and 8xMg <sup>2+</sup>                     | 356 | 120 | 2 |
| 4x2 ATP<br>(V53A)             | PDB: 4CZF<br>(V53A<br>mutation)  | 8xATP and 8xMg <sup>2+</sup>                     | 356 | 120 | 2 |
| 4x2 ATP<br>(EcMreB,<br>E276D) | PDB: 4CZF<br>homology<br>model   | 8xATP and 8xMg <sup>2+</sup>                     | 356 | 100 | 2 |

|                          |                                           |                                           |     |     |   |
|--------------------------|-------------------------------------------|-------------------------------------------|-----|-----|---|
|                          | (E276D mutation)                          |                                           |     |     |   |
| 4x2 ATP (EcMreB, I141V)  | PDB: 4CZF homology model (I141V mutation) | 8xATP and 8xMg <sup>2+</sup>              | 356 | 100 | 2 |
| 4x2 ATP (EcMreB, R124C)  | PDB: 4CZF homology model (R124C mutation) | 8xATP and 8xMg <sup>2+</sup>              | 356 | 100 | 2 |
| 4x2 ATP (EcMreB, V55A)   | PDB: 4CZF homology model (V55A mutation)  | 8xATP and 8xMg <sup>2+</sup>              | 356 | 100 | 2 |
| 1x1 ATP membrane         | PDB: 4CZF                                 | ATP and Mg <sup>2+</sup> , membrane patch | 128 | 100 | 2 |
| 1x1 ATP membrane (E275D) | PDB: 4CZF (E275D mutation)                | ATP and Mg <sup>2+</sup> , membrane patch | 128 | 100 | 1 |

|                                |                                                                                 |                                                  |     |     |   |
|--------------------------------|---------------------------------------------------------------------------------|--------------------------------------------------|-----|-----|---|
| 1x1 ATP<br>membrane<br>(I138V) | PDB: 4CZF<br>(I138V<br>mutation)                                                | ATP and Mg <sup>2+</sup> ,<br>membrane patch     | 128 | 100 | 1 |
| 1x1 ATP<br>membrane<br>(R121C) | PDB: 4CZF<br>(R121C<br>mutation)                                                | ATP and Mg <sup>2+</sup> ,<br>membrane patch     | 128 | 100 | 1 |
| 1x1 ATP<br>membrane<br>(V53A)  | PDB: 4CZF<br>(V53A<br>mutation)                                                 | ATP and Mg <sup>2+</sup> ,<br>membrane patch     | 128 | 100 | 1 |
| 4x2 ATP<br>membrane<br>(R121C) | PDB: 4CZF<br>(R121C<br>mutation)                                                | 8xATP and 8xMg <sup>2+</sup> ,<br>membrane patch | 434 | 120 | 2 |
| 4x2 ATP<br>membrane<br>(V53A)  | PDB: 4CZF<br>(V53A<br>mutation)                                                 | 8xATP and 8xMg <sup>2+</sup> ,<br>membrane patch | 434 | 120 | 2 |
| 4x2 ATP<br>RodZ                | PDB: 4CZF<br>(for MreB)<br><br>PDB:<br>2WUS (for<br>RodZ,<br>homology<br>model) | 8xATP and 8xMg <sup>2+</sup>                     | 481 | 100 | 2 |

|                           |                                                                                                       |                              |     |     |   |
|---------------------------|-------------------------------------------------------------------------------------------------------|------------------------------|-----|-----|---|
| 4x2 ATP<br>(V53A)<br>RodZ | PDB: 4CZF<br>(for MreB,<br>with V53A<br>mutation)<br>PDB:<br>2WUS (for<br>RodZ,<br>homology<br>model) | 8xATP and 8xMg <sup>2+</sup> | 481 | 100 | 2 |
|---------------------------|-------------------------------------------------------------------------------------------------------|------------------------------|-----|-----|---|

12 **Supplementary Table 2: Parameter values for the coarse-grained model.**

| Parameter  | Physical meaning                 | Value                                                                        |
|------------|----------------------------------|------------------------------------------------------------------------------|
| $C$        | Bending modulus of MreB filament | $1.4 \times 10^4 k_B T \text{ nm}$                                           |
| $K$        | Torsional rigidity               | $4.6 \times 10^3 k_B T \text{ nm}$                                           |
| $k_0$      | Intrinsic curvature              | $2.3 \times 10^{-3} \text{ rad nm}^{-1}$                                     |
| $\omega_0$ | Intrinsic twisting rate          | 0.01 – 0.05 $\text{rad nm}^{-1}$<br>0.033 $\text{rad nm}^{-1}$ for wild-type |
| $r$        | Cell radius                      | 400 nm                                                                       |
| $V$        | Membrane binding potential       | $4 k_B T \text{ nm}^{-1}$                                                    |
| $\mu_0$    | Polymerization free energy       | $2 k_B T \text{ nm}^{-1}$                                                    |

14 **Supplementary Table 3: Strains used in this study.**

| <b>Strain name</b> | <b>Genotype</b>                                      | <b>Source</b> |
|--------------------|------------------------------------------------------|---------------|
| KC508              | MG1655 <i>csrD::Km, mreB'::msfGFP-mreB''</i>         | 1             |
| KC507              | MG1655 <i>csrD::Km, mreB'::msfGFP-mreB''-E276D</i>   | 1             |
| KC968              | MG1655 <i>csrD::Km, mreB'::msfGFP-mreB''-R124C</i>   | 2             |
| MreB(msfGFP)-EP028 | MG1655 $\Delta$ <i>mreB</i> [pRMmreBCD-V55A-msfGFP]  | 3             |
| MreB(msfGFP)-EP067 | MG1655 $\Delta$ <i>mreB</i> [pRMmreBCD-I141V-msfGFP] | 3             |

15

16



17 **Supplemental Figures**

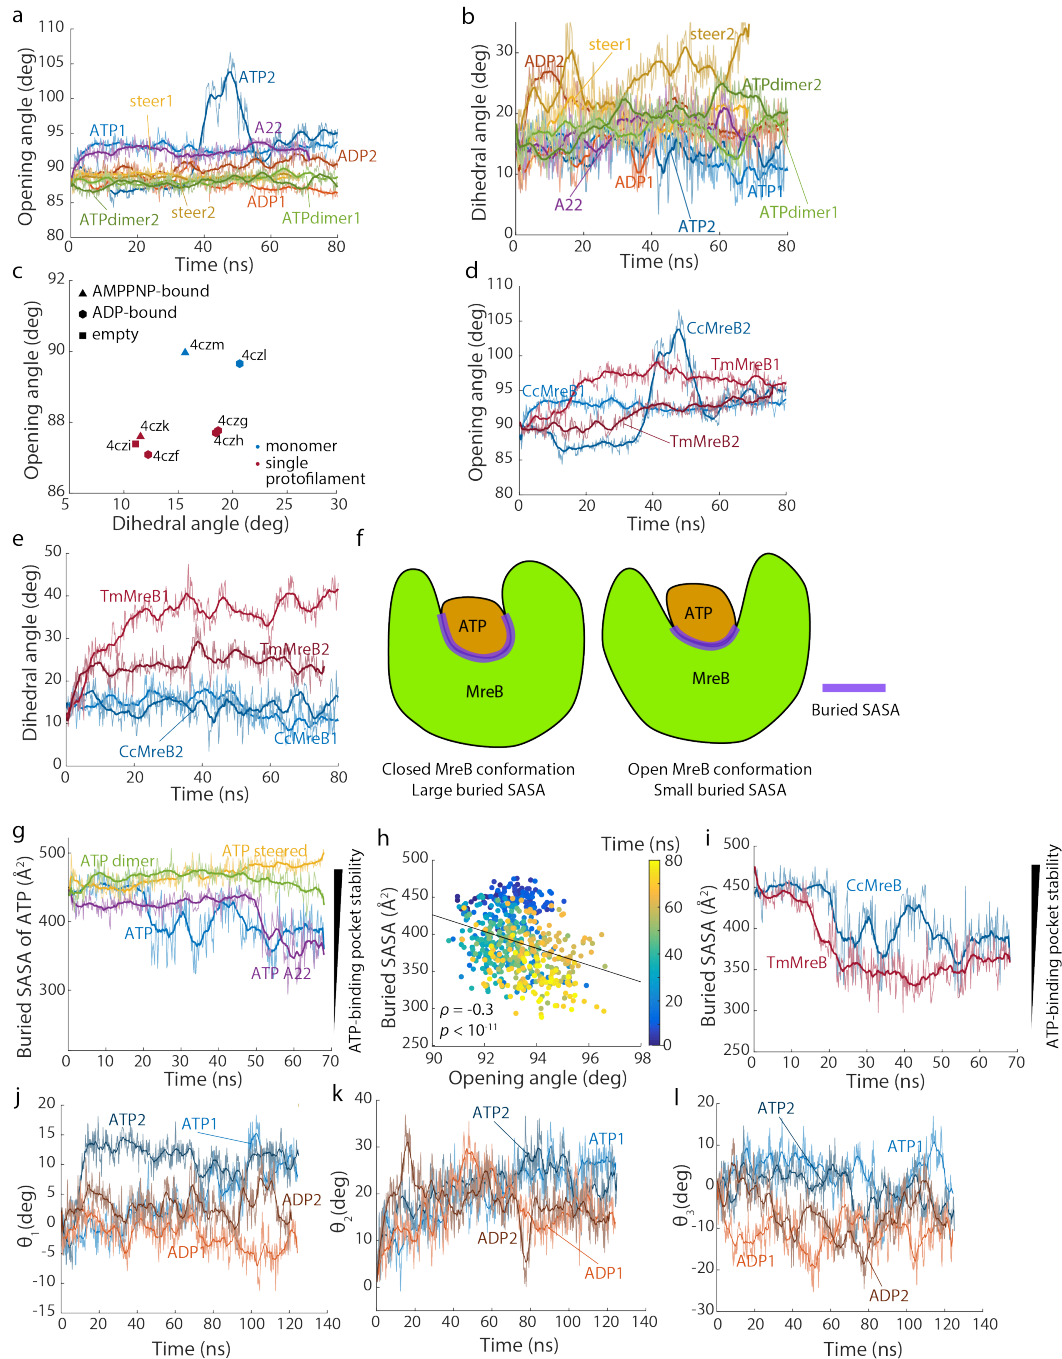

18

19 **Supplementary Figure 1: MreB monomer and dimer conformations are**  
 20 **nucleotide-dependent.**

21 a-b) Trajectories of opening angles (a) and dihedral angles (b) in each simulated  
 22 system. For dimer simulations, the calculated values are for the (-) subunit. Thick

23 lines are the results of smoothing the raw data (light lines) using a sliding window  
24 of 20 frames. ATP-bound monomers had larger opening angles than other  
25 systems.

26 c) Scatter plots of opening and dihedral angles in CcMreB crystal structures. The  
27 monomeric crystal structures (blue) have larger opening angles than those  
28 forming single protofilaments (red).

29 d-e) Trajectories of (d) opening angles and (e) dihedral angles in ATP-bound  
30 CcMreB and TmMreB. TmMreB exhibited larger dihedral angles than CcMreB;  
31 results were more variable for TmMreB than CcMreB across two replicate  
32 simulations. Thick lines are the results of smoothing the raw data (light lines)  
33 using a sliding window of 20 frames.

34 f) Schematic of buried solvent-accessible surface area (SASA) between ATP and  
35 MreB. A closed MreB conformation has a larger interaction region with ATP  
36 (purple shading), and therefore a larger buried SASA than an open MreB  
37 conformation.

38 g) Trajectories for buried SASA of ATP. Buried SASA is related to the open or  
39 closed states of the MreB monomer. Open states (ATP- or ATP-A22-bound) had  
40 lower buried SASA values, whereas closed states (dimer or steered simulations)  
41 maintained high buried SASA values, indicating a stabilized ATP-binding pocket  
42 that may facilitate ATP hydrolysis. Thick lines are the results of smoothing the  
43 raw data (light lines) using a sliding window of 20 frames.

44 h) Scatter plots of buried SASA and opening angle in a simulation of an ATP-bound  
45 MreB monomer. Buried SASA negatively correlated with opening angle

46 (Spearman's  $\rho = -0.3$ ,  $p < 10^{-11}$  using permutation test), suggesting that an open  
47 conformation destabilizes the ATP-binding pocket. Each dot represents one time  
48 point, with the dots colored by simulation time.

49 i) Trajectories of buried SASA in ATP-bound CcMreB and ATP-bound TmMreB. In  
50 both systems, the buried SASA dropped similarly, indicating that although  
51 TmMreB and CcMreB conformations behaved differently, their interactions with  
52 ATP were similar. Thick lines are the results of smoothing of the raw data (light  
53 lines) using a sliding window of 20 frames.

54 j-l) Trajectories of the three Euler angles in each simulated MreB dimer system.  
55 ATP-bound dimers consistently exhibited larger  $\theta_1$  (j) and  $\theta_2$  (k) values than ADP-  
56 bound dimers; no clear twisting in  $\theta_3$  was observed (l). Thick lines are the results  
57 of smoothing the raw data (light lines) using a sliding window of 20 frames.

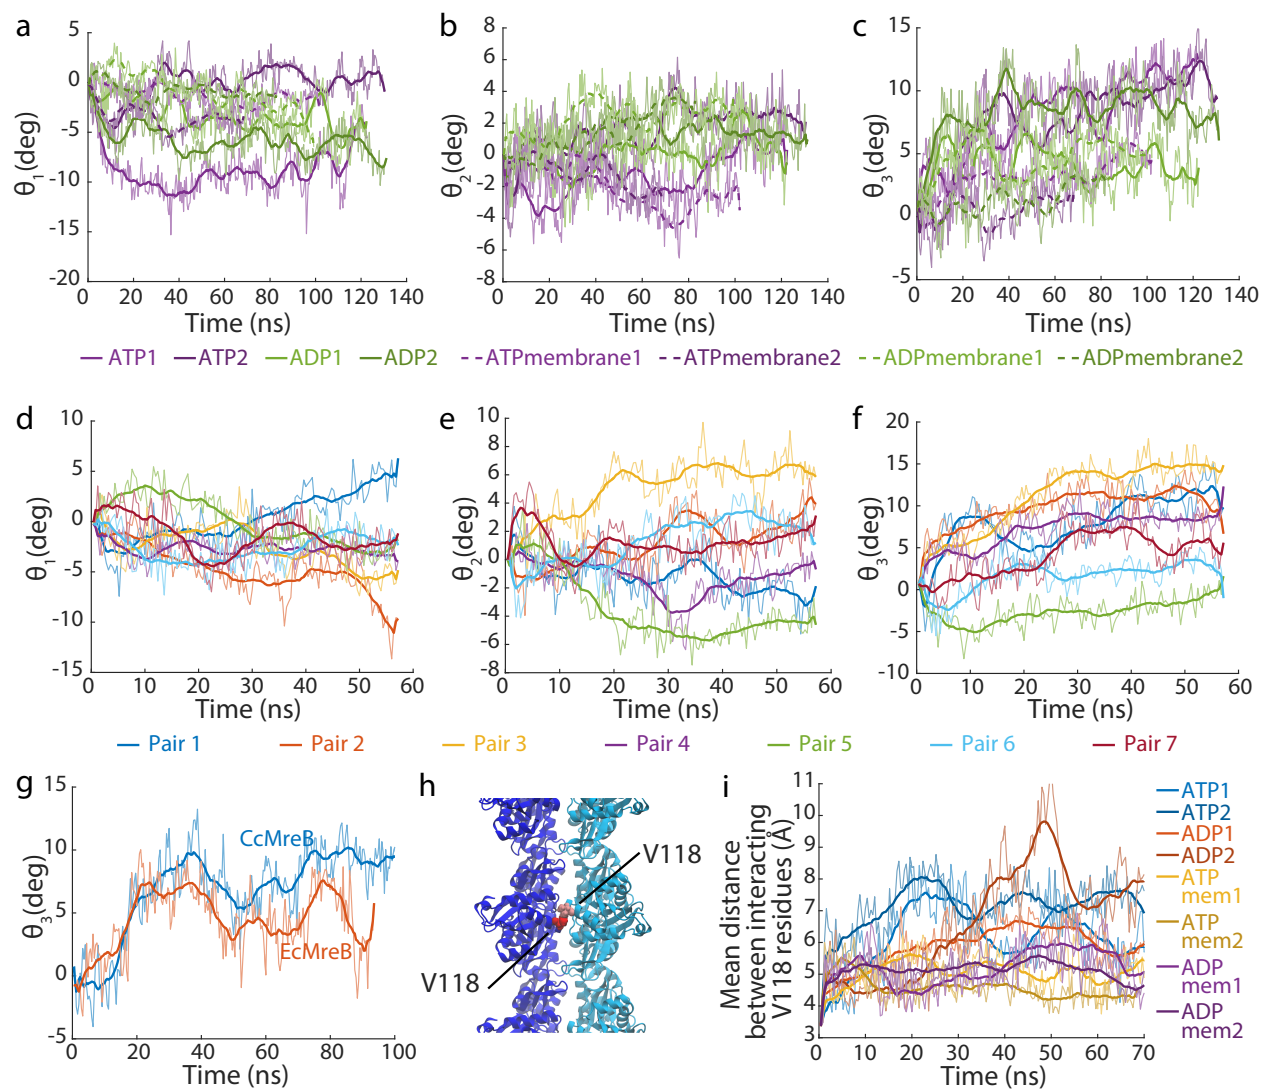

58  
 59 **Supplementary Figure 2: Interaction between a CcMreB double protofilament and**  
 60 **a membrane.**

61 a-c) Trajectories of the three Euler angles in each simulated system of MreB 4x2  
 62 protofilaments, calculated for the middle doublet pair (Pair 2, Fig. 3a).  $\theta_1$  and  $\theta_2$   
 63 remained close to zero, whereas the ATP-bound protofilaments in water  
 64 exhibited larger twisting in  $\theta_3$ . Thick lines are the results of smoothing the raw  
 65 data (light lines) using a sliding window of 20 frames.

66 d-f) Trajectories of the three Euler angles in each neighboring pair of MreB doublets  
67 in an 8x2 protofilament simulation. Although the system still exhibited large  
68 variability by the end of the simulation,  $\theta_1$  and  $\theta_2$  largely remained close to zero,  
69 while the values of  $\theta_3$  were comparable to those in ATP-bound 4x2 simulations  
70 (panels a-c). Thick lines are the results of smoothing the raw data (light lines)  
71 using a sliding window of 20 frames.

72 g) Trajectories of twisting angle  $\theta_3$  for 4x2 simulations of CcMreB and EcMreB.  
73 EcMreB exhibited quantitatively similar twisting angles as CcMreB, suggesting  
74 that our simulation results in CcMreB are applicable to *E. coli*. Thick lines are the  
75 results of smoothing the raw data (light lines) using a sliding window of 20  
76 frames.

77 h) V118 residues facilitate inter-protofilament interaction between two antiparallel  
78 MreB protofilaments.

79 i) The mean distance between interacting V118 residues increased over time,  
80 suggesting a loss of inter-protofilament interaction. For membrane-bound  
81 simulations, the V118 distances remained small, indicating that the membrane  
82 stabilizes the double protofilament conformation. Thick lines are the results of  
83 smoothing of the raw data (light lines) using a sliding window of 20 frames.

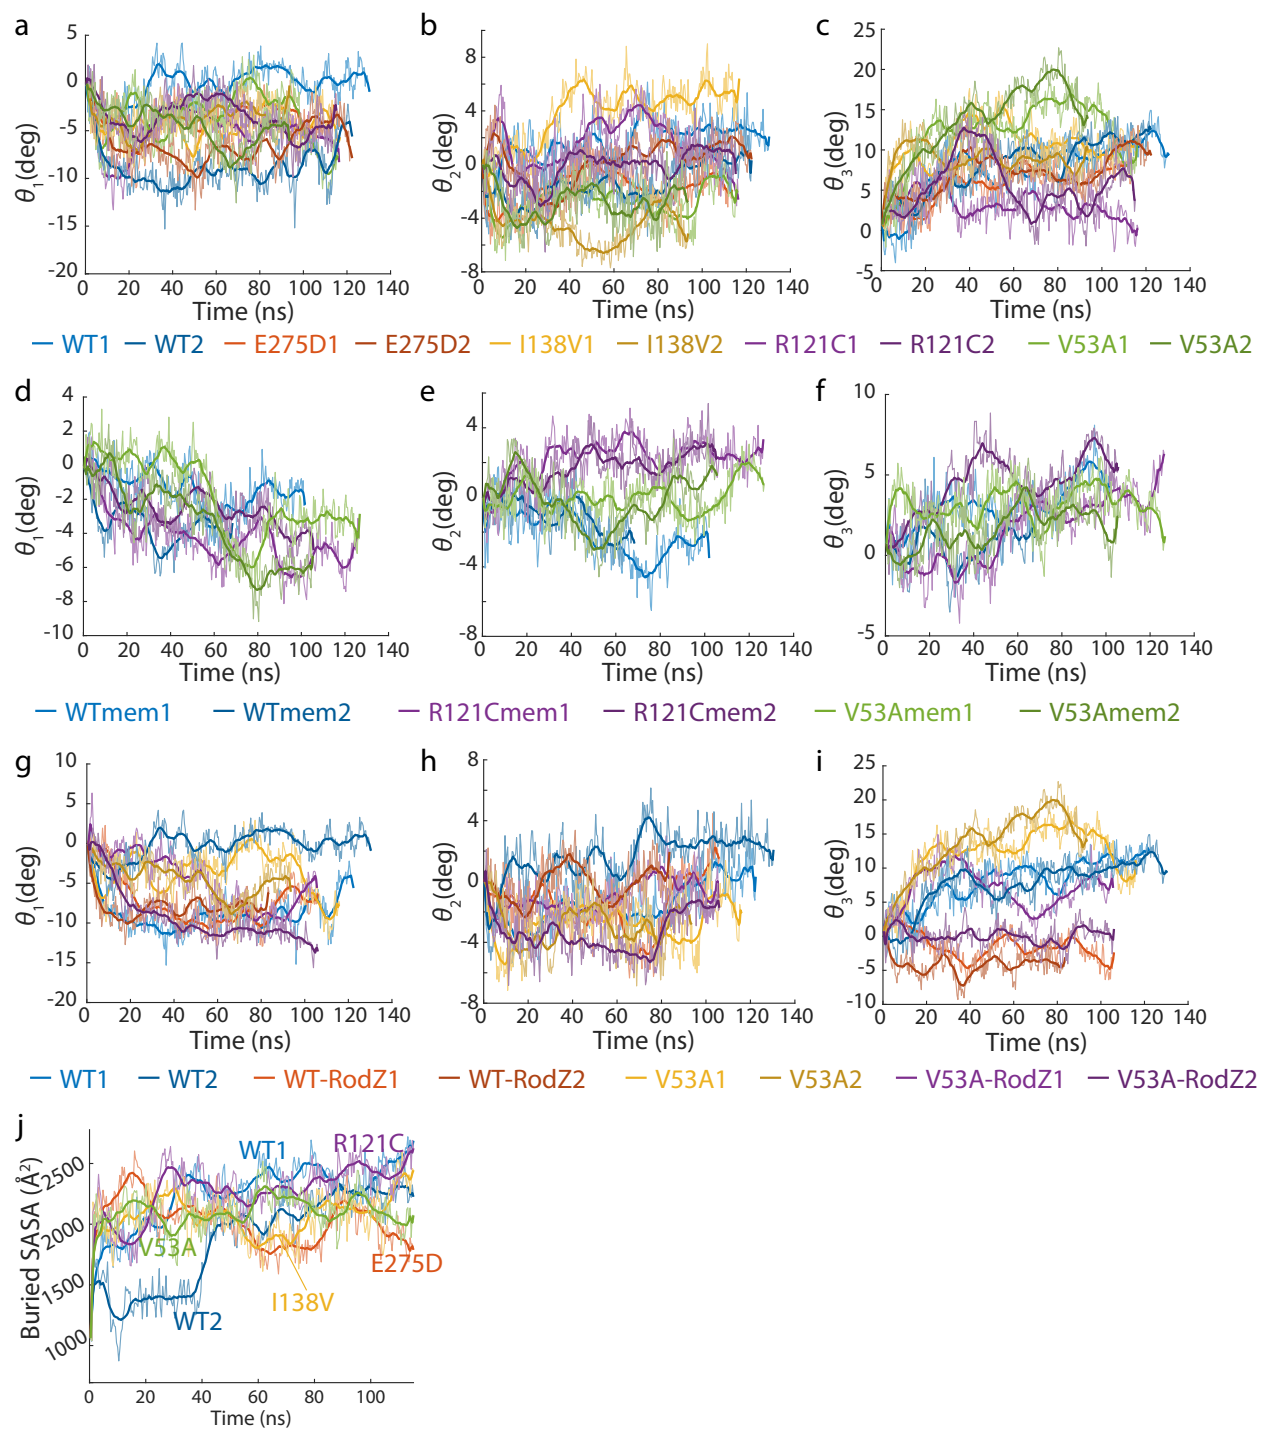

84

85 **Supplementary Figure 3: MreB twist angle is affected by mutations and RodZ**  
 86 **binding.**

87 a-c) Trajectories of the three Euler angles in 4x2 protofilaments of MreB mutants,  
 88 calculated for the middle doublet pair (Pair 2, Fig. 3a).  $\theta_1$  and  $\theta_2$  were unaffected,

89 while  $\theta_3$  was systematically tuned by mutations. Thick lines are the results of  
90 smoothing the raw data (light lines) using a sliding window of 20 frames.

91 d-f) Trajectories of the three Euler angles in 4x2 protofilaments of wild-type MreB  
92 and R121C and V53A mutants bound to a membrane patch, calculated for the  
93 middle doublet pair (Pair 2, Fig. 3a). In both mutants, all three angles behaved  
94 similarly as in wildtype. Despite the distinct values of  $\theta_3$  in water, membrane  
95 binding suppressed all twisting to similar extents. Thick lines are the results of  
96 smoothing the raw data (light lines) using a sliding window of 20 frames.

97 g-i) Trajectories of the three Euler angles in 4x2 protofilaments of wild-type MreB  
98 and the V53A mutant, with or without the cytoplasmic tail of RodZ.  $\theta_1$  and  $\theta_2$  were  
99 largely unaffected, while  $\theta_3$  decreased upon RodZ binding in both wildtype and  
100 the V53A mutant. Thick lines are the results of smoothing the raw data (light  
101 lines) using a sliding window of 20 frames.

102 j) Buried SASA of the membrane-binding interface for CcMreB wild-type and mutant  
103 monomers. All simulations exhibited similar buried SASA at equilibrium,  
104 suggesting that the mutations did not alter the membrane binding properties of  
105 MreB.

106

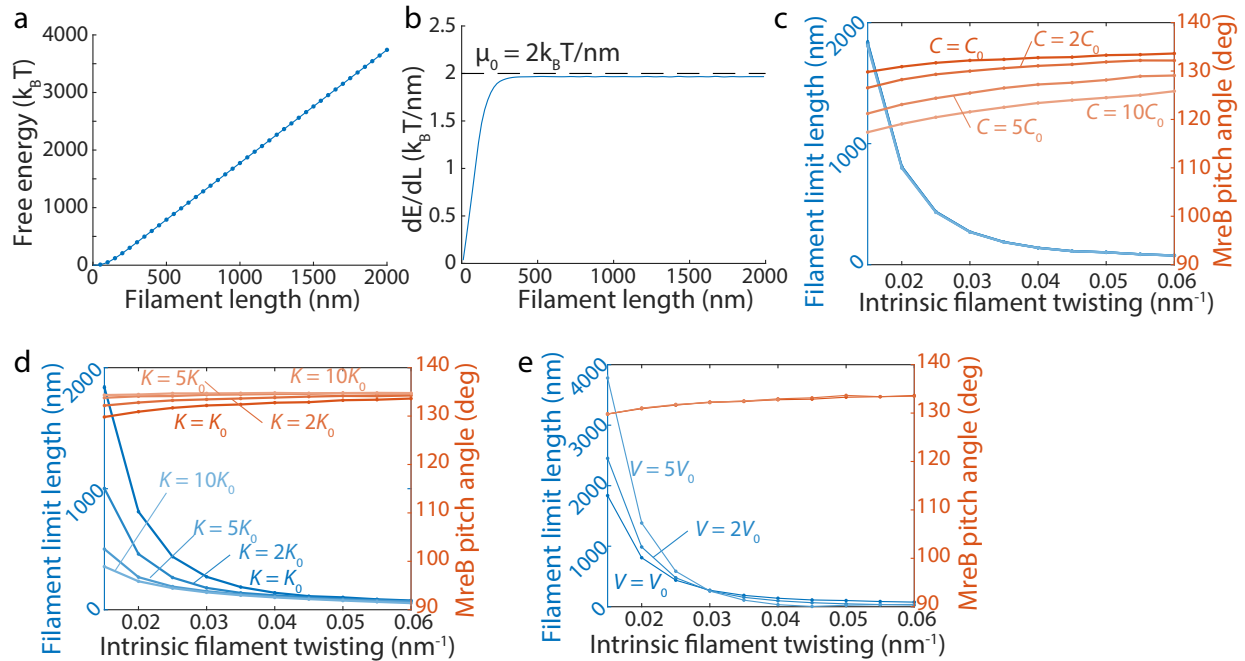

107

108 **Supplementary Figure 4: MreB twist angle predicts MreB filament limit length and**  
 109 **orientation *in vivo*.**

- 110 a) Filament free energy as a function of filament length when bound to a cylindrical  
 111 membrane with radius  $r = 80$  nm.
- 112 b) For the filament in (a),  $\frac{dE}{dL} < \mu_0$  for all filament lengths, indicating that the filament  
 113 could extend without a limit length.
- 114 c) The effect of varying the bending modulus  $C$  in the coarse-grained model. Larger  
 115  $C$  did not affect the predicted limit lengths, but decreased the predicted pitch  
 116 angles.
- 117 d) The effect of varying the twist modulus  $K$  in the coarse-grained model. Larger  $K$   
 118 decreased the predicted limit lengths, but did not substantially alter the predicted  
 119 pitch angles.



120 e) Increasing the membrane binding potential  $V$  increased the predicted limit  
121 lengths but did not alter the predicted pitch angles. The pitch angle values were  
122 highly overlapping for all values of  $V$ .

123

124 **Supplementary References**

125

126 1 Ouzounov, N. *et al.* MreB orientation correlates with cell diameter in *Escherichia*  
127 *coli*. *Biophysical journal* **111**, 1035-1043 (2016).

128 2 Colavin, A., Shi, H. & Huang, K. C. RodZ modulates geometric localization of the  
129 bacterial actin MreB to regulate cell shape. *Nature communications* **9**, 1280  
130 (2018).

131 3 Shi, H. *et al.* Deep phenotypic mapping of bacterial cytoskeletal mutants reveals  
132 physiological robustness to cell size. *Current Biology* **27**, 3419-3429. e3414  
133 (2017).

134
